# Supplementary material
Source: publisher figshare collection journal article supplement (https://plos.figshare.com/articles/dataset/_/19147225)
Supplement: Supplementary file [file 34019653]

**S2 Table. The definition list of TW drugs.**

| RASIs                                       | Diuretics                                 | NSAIDs                     |
|---------------------------------------------|-------------------------------------------|----------------------------|
| (Angiotensin-converting enzyme inhibitors)  | (Loop Diuretics)                          | Acemetacin                 |
| Alacepril                                   | Azosemide                                 | Alminoprofen               |
| Benazepril Hydrochloride                    | Bumetanide                                | Amfenac Sodium Hydrate     |
| Captopril                                   | Etacrynic Acid                            | Aminopyrine                |
| Cilazapril Hydrate                          | Furosemide                                | Ampiroxicam                |
| Delapril Hydrochloride                      | Piretanide                                | Aspirin                    |
| Enalapril Maleate                           | Torasemide                                | Bendazac                   |
| Imidapril Hydrochloride                     | (Thiazide and Thiazide related Diuretics) | Benzydamine Hydrochloride  |
| Lisinopril Hydrate                          | Benzyhydrochlorothiazide                  | Bromfenac Sodium Hydrate   |
| Perindopril Erbumine                        | Chlortalidone                             | Bufexamac                  |
| Quinapril Hydrochloride                     | Clofenamide                               | Celecoxib                  |
| Temocapril Hydrochloride                    | Clorexolone                               | Choline Salicylate         |
| Trandolapril                                | Hydrochlorothiazide                       | Diclofenac Sodium          |
| (Angiotensin II receptor antagonists)       | Indapamide                                | Ethenzamide                |
| Azilsartan                                  | Mefruside                                 | Etodolac                   |
| Candesartan Cilexetil                       | Methyclothiazide                          | Felbinac                   |
| Irbesartan                                  | Meticrane                                 | Felbinac Ethyl             |
| Losartan Potassium                          | Trichlormethiazide                        | Fenbufen                   |
| Olmесartan Medoxomil                        | (Potassium-Sparing Diuretics)             | Fenoprofen Calcium         |
| Telmisartan                                 | Eplerenone                                | Floctafenine               |
| Valsartan                                   | Potassium Canrenoate                      | Flufenamate Aluminum       |
| (Renin inhibitor)                           | Spironolactone                            | Flufenamic                 |
| Aliskiren Fumarate                          | Triamterene                               | Flurbiprofen               |
| (Angiotensin receptor-neprilysin inhibitor) | (Vasopressin Receptor 2 antagonists)      | Flurbiprofen Axetil        |
| Sacubitril Valsartan Sodium Hydrate         | Mozavaptan Hydrochloride                  | Ibuprofen                  |
|                                             | Tolvaptan                                 | Ibuprofen L-lysine         |
|                                             |                                           | Ibuprofen Piconol          |
|                                             |                                           | Indometacin                |
|                                             |                                           | Indometacin Farnesil       |
|                                             |                                           | Indometacin Sodium Hydrate |
|                                             |                                           | Isopropylantipyrene        |
|                                             |                                           | Ketophenylbutazone         |
|                                             |                                           | Ketoprofen                 |
|                                             |                                           | Lornoxicam                 |
|                                             |                                           | Loxoprofen Sodium Hydrate  |
|                                             |                                           | Mefenamic Acid             |
|                                             |                                           | Meloxicam                  |
|                                             |                                           | Mesalazine                 |
|                                             |                                           | Methyl Salicylate          |
|                                             |                                           | Migrenin                   |
|                                             |                                           | Mofezolac                  |
|                                             |                                           | Nabumetone                 |
|                                             |                                           | Naproxen                   |
|                                             |                                           | Nepafenac                  |
|                                             |                                           | Nifenazone                 |
|                                             |                                           | Oxaprozin                  |
|                                             |                                           | Piroxicam                  |
|                                             |                                           | Pranoprofen                |
|                                             |                                           | Proglumetacin Maleate      |
|                                             |                                           | Protizinic Acid            |
|                                             |                                           | Salazosulfapyridine        |
|                                             |                                           | Salicylamide               |
|                                             |                                           | Salicylic Acid             |
|                                             |                                           | Sodium Salicylate          |
|                                             |                                           | Sulindac                   |
|                                             |                                           | Sulpyrine Hydrate          |
|                                             |                                           | Suprofen                   |
|                                             |                                           | Tenoxicam                  |
|                                             |                                           | Tiaprofenic Acid           |
|                                             |                                           | Tolfenamic Acid            |
|                                             |                                           | Ufenamate                  |
|                                             |                                           | Zaltoprofen                |

Abbreviations: NSAIDS, nonsteroidal antiinflammatory drugs; RASIs, renin angiotensin-system inhibitors.
